# Supplementary material
Source: Research Square preprint supplement (doi:10.21203/rs.3.rs-9844132/v1)

## 数据使用许可声明

致相关各方：

本函确认，王书剑作为本研究所道路表面缺陷图像数据集的数据持有人，已授权周诗薇使用该数据集，用于题为：“LDA-YOLO11：用于边缘可部署路面缺陷检测的轻量级细节注意检测器 / LDA-YOLO11: A lightweight detail-attention detector for edge-deployable road surface defect detection”的科研项目和学术论文投稿，

数据集说明：

本研究使用的数据集为王书剑持有并管理的道路表面缺陷图像数据集，共包含 3423 张道路表面缺陷图像。该数据集用于道路表面缺陷检测模型的训练验证、测试和性能评估。根据研究任务需求，研究团队对图像中的道路裂缝、路面破损和坑洞等目标进行了人工边界框标注，并将标注结果转换为 YOLO 格式标签文件，

许可用途包括：

1. 深度学习模型的训练、验证和测试；
2. 定量与定性性能评估；
3. 在学术论文中发表汇总的实验结果、图表及具有代表性的处理输出；
4. 在必要时且符合数据使用协议的前提下，向期刊编辑和同行评审员披露数据集以供评估。

原始图像数据集由王书剑持有并管理。未经王书剑事先书面许可，原始图像及人工标注文件不得公开分发、上传至公共存储库或与第三方共享。

如需获取数据集以进行重复实验或验证，经提出合理请求后，在获得王书剑批准并签署适当的数据使用协议的前提下，可予以考虑。

授权人：王书剑

姓名：王书剑

职务：专任教师

机构/公司：宜昌科技职业学院

电子邮箱：w13807266051@163.com

签名：王书剑

日期：2026年6月2日

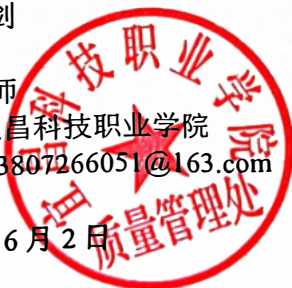

## Data Usage License Statement

To all concerned parties:

This letter confirms that Wang Shujian, as the data holder of the road surface defect image dataset used in this study, has authorized Zhou Shiwei to use the dataset for the research project and academic paper submission titled "LDA-YOLO11: A lightweight detail-attention detector for edge-deployable road surface defect detection."

Dataset description:

The dataset used in this study is the road surface defect image dataset owned and managed by Wang Shujian, which contains a total of 3,423 images of road surface defects. This dataset was used for the training, validation, testing, and performance evaluation of road surface defect detection models. In accordance with the research objectives, the research team manually annotated bounding boxes for targets such as road cracks, pavement damage, and potholes in the images, and converted the annotation results into YOLO-format label files.

Permitted uses include:

1. Training, validation, and testing of deep learning models;
2. Quantitative and qualitative performance evaluation;
3. Publication of summarized experimental results, charts, and representative processing outputs in academic papers;
4. Disclosure of the dataset to journal editors and peer reviewers for evaluation, when necessary and in compliance with the data usage agreement.

The original image dataset is owned and managed by Wang Shujian. Without Wang Shujian's prior written permission, the original images and manually annotated files may not be publicly distributed, uploaded to public repositories, or shared with third parties.

Requests to obtain the dataset for the purpose of reproducing experiments or validation will be considered upon submission of a reasonable request, subject to Wang Shujian's approval and the signing of an appropriate data usage agreement.

Authorizer: Wang Shujian  
Name: Wang Shujian  
Position: Full-time Faculty Member  
Institution/Company: Yichang Vocational College of Science and Technology  
Email: w13807266051@163.com  
Signature: Wang Shujian  
Date: June 2, 2026



Supplement: Supplementary file 1 [file 27638bc0a3677e5a12b5ef2f.pdf]
