# Supplementary material
Source: Research Square preprint supplement (doi:10.21203/rs.3.rs-9844132/v1)

## Ethics Exemption Statement

This certifies that the research project titled “LDA-YOLO11: A lightweight detail-attention detector for edge-deployable road surface defect detection” has undergone a research ethics review by this institution.

This study utilizes road surface defect image data for the development, training, validation, and performance evaluation of deep learning object detection models. The study does not involve human participants, human biological samples, medical information, personally identifiable information, animal experiments, or clinical data.

After review, this study meets the criteria for exemption from ethical review. In accordance with the institutional regulations on research ethics review, ethical review for this study is hereby waived.

Ethics Review Body: Quality Management Office, Yichang Vocational College of Science and Technology

Ethics Review Exemption Number: YVST-ETH-2026-0002

Approval/Exemption Date: June 2, 2026

Signature of Head of Quality Management Office: Zhang Fengshu

Seal of Quality Management Office:

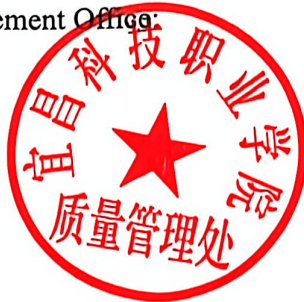

## 伦理审查豁免证明

兹证明，题为“LDA-YOLO11：用于边缘可部署路面缺陷检测的轻量级细节注意检测器 / LDA-YOLO11: A lightweight detail-attention detector for edge-deployable road surface defect detection”的研究项目已由本单位进行科研伦理审查。

本研究使用道路表面缺陷图像数据，用于深度学习目标检测模型的开发、训练、验证和性能评估。该研究不涉及人体参与者、人体生物样本、医学信息、可识别个人信息、动物实验或临床数据。

经审查，本研究符合伦理审查豁免条件。根据本单位科研伦理审查相关规定，同意该研究免于进一步伦理审查。

伦理审查机构：宜昌科技职业学院质量管理处

伦理审查豁免编号：YVST-EIH-2026-0002

批准/豁免日期：2026年6月2日

质量管理处负责人签字：

质量管理处盖章：

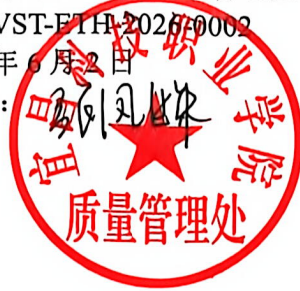

Supplement: Supplementary file 2 [file 4eb3af4762e331e4cf3e9714.pdf]
